# Supplementary material for: The Natural Stilbenoid (–)-Hopeaphenol Inhibits Cellular Entry of SARS-CoV-2 USA-WA1/2020, B.1.1.7, and B.1.351 Variants
Source: PubMed Central journal article supplement (PMC8597786; doi:10.1128/aac.00772-21), 2021-11-17
Supplement: aac.00772-21-s0001.pdf [file aac.00772-21-s0001.pdf]

4 **Supplemental Table 1.** Summary of all high-content imaging data obtained from pseudovirus  
 5 transduction assays.

| Spike sequence | Compound (50 $\mu$ M) | Replicate | N Nuclei | N GFP+ nuclei | % GFP+ nuclei | Average | SEM   | p value vs. infected, no-drug |
|----------------|-----------------------|-----------|----------|---------------|---------------|---------|-------|-------------------------------|
| Uninfected     | No drug               | 1         | 11362    | 1             | 0.01%         | 0.01%   | 0.00% |                               |
|                |                       | 2         | 13479    | 1             | 0.01%         |         |       |                               |
|                |                       | 3         | 12014    | 2             | 0.01%         |         |       |                               |
| USA-WA1/2020   | No drug               | 1         | 10155    | 266           | 2.63%         | 2.45%   | 0.17% |                               |
|                |                       | 2         | 11005    | 287           | 2.61%         |         |       |                               |
|                |                       | 3         | 11311    | 239           | 2.11%         |         |       |                               |
|                | Hopeaphenol           | 1         | 16077    | 120           | 0.75%         | 0.69%   | 0.03% | <b>3.5 x 10<sup>-3</sup></b>  |
|                |                       | 2         | 14310    | 93            | 0.65%         |         |       |                               |
|                |                       | 3         | 11206    | 76            | 0.68%         |         |       |                               |
|                | Vatalbinoside A       | 1         | 12729    | 154           | 1.21%         | 0.99%   | 0.41% | 0.16                          |
|                |                       | 2         | 11733    | 183           | 1.56%         |         |       |                               |
|                |                       | 3         | 5774     | 12            | 0.21%         |         |       |                               |
|                | Vaticanol B           | 1         | 11652    | 253           | 2.17%         | 2.05%   | 0.12% | 0.26                          |
|                |                       | 2         | 13822    | 251           | 1.82%         |         |       |                               |
|                |                       | 3         | 11072    | 240           | 2.17%         |         |       |                               |
|                | Resveratrol           | 1         | 7611     | 142           | 1.87%         | 2.36%   | 0.36% | 0.74                          |
|                |                       | 2         | 6485     | 198           | 3.05%         |         |       |                               |
|                |                       | 3         | 5396     | 116           | 2.15%         |         |       |                               |
| B.1.1.7        | No drug               | 1         | 11049    | 529           | 4.80%         | 5.36%   | 1.59% |                               |
|                |                       | 2         | 10893    | 1229          | 11.62%        |         |       |                               |
|                |                       | 3         | 17605    | 709           | 4.02%         |         |       |                               |
|                |                       | 4         | 12996    | 396           | 3.05%         |         |       |                               |
|                |                       | 5         | 10218    | 338           | 3.32%         |         |       |                               |
|                | Hopeaphenol           | 1         | 13236    | 163           | 1.23%         | 1.83%   | 0.73% | <b>4.0 x 10<sup>-4</sup></b>  |
|                |                       | 2         | 14298    | 575           | 4.02%         |         |       |                               |
|                |                       | 3         | 10285    | 110           | 1.07%         |         |       |                               |
|                |                       | 5         | 12903    | 128           | 0.99%         |         |       |                               |
|                | Vatalbinoside A       | 3         | 17919    | 443           | 2.48%         | 2.35%   | 0.18% | 0.07                          |
|                |                       | 4         | 11426    | 294           | 2.57%         |         |       |                               |
|                |                       | 5         | 10585    | 211           | 1.99%         |         |       |                               |
|                | Vaticanol B           | 3         | 17666    | 431           | 2.44%         | 2.02%   | 0.22% | <b>0.002</b>                  |
|                |                       | 4         | 12375    | 211           | 1.71%         |         |       |                               |
|                |                       | 5         | 10256    | 194           | 1.89%         |         |       |                               |
| B.1.351        | No drug               | 1         | 10869    | 607           | 5.61%         | 4.55%   | 0.64% |                               |
|                |                       | 2         | 13019    | 847           | 6.48%         |         |       |                               |
|                |                       | 3         | 19538    | 710           | 3.62%         |         |       |                               |
|                |                       | 4         | 13665    | 416           | 3.04%         |         |       |                               |
|                |                       | 5         | 10083    | 403           | 3.99%         |         |       |                               |
|                | Hopeaphenol           | 1         | 13631    | 99            | 0.73%         | 0.93%   | 0.11% | <b>0.012</b>                  |
|                |                       | 2         | 12749    | 102           | 0.80%         |         |       |                               |
|                |                       | 3         | 11497    | 112           | 0.97%         |         |       |                               |
|                |                       | 4         | 12391    | 153           | 1.23%         |         |       |                               |
|                | Vatalbinoside A       | 3         | 18003    | 293           | 1.63%         | 1.87%   | 0.12% | <b>0.029</b>                  |
|                |                       | 4         | 13408    | 270           | 1.99%         |         |       |                               |
|                |                       | 5         | 10675    | 213           | 1.99%         |         |       |                               |
|                | Vaticanol B           | 3         | 19456    | 566           | 2.93%         | 3.29%   | 0.33% | 0.35                          |
|                |                       | 4         | 11705    | 350           | 2.99%         |         |       |                               |
|                |                       | 5         | 10869    | 429           | 3.95%         |         |       |                               |

6

7 **Supplemental Table 2.** Summary of resazurin-based viability measurements obtained from cells  
 8 infected with SARS-CoV-2 variants. A.U. = arbitrary units.

| Virus    | Replicate | Uninfected cell viability (A.U.) |        | Infected cell viability (A.U.) |         | % viability vs. uninfected cells | p value            |
|----------|-----------|----------------------------------|--------|--------------------------------|---------|----------------------------------|--------------------|
|          |           | Average                          | SD     | Average                        | SD      |                                  |                    |
| WA1/2020 | 1         | 6866540                          | 547083 | 1150510                        | 213694  | 16.8%                            | < 10 <sup>-4</sup> |
|          | 2         | 6475746                          | 532339 | 1120360                        | 2569071 | 17.3%                            |                    |
|          | 3         | 6943744                          | 836644 | 1192919                        | 87291   | 17.2%                            |                    |
| B.1.1.7  | 1         | 3130441                          | 335566 | 2709147                        | 302454  | 86.5%                            | <b>0.007</b>       |
|          | 2         | 3329776                          | 408199 | 2889745                        | 67793   | 86.8%                            |                    |
|          | 3         | 5272236                          | 129469 | 4383816                        | 387612  | 83.1%                            |                    |
| B.1.351  | 1         | 3219953                          | 312980 | 2566185                        | 210668  | 79.7%                            | <b>0.026</b>       |
|          | 2         | 3340315                          | 232577 | 2601518                        | 139652  | 77.9%                            |                    |
|          | 3         | 4877282                          | 430514 | 4245177                        | 444644  | 87.0%                            |                    |

9

10

11

12 **Supplemental Table 3.** Summary of all high-content imaging data obtained from virus yield  
 13 reduction assays.

| Virus        | Agent           | Concentration | Replicate | N Nuclei | N infected | % infected | Average | SD    |
|--------------|-----------------|---------------|-----------|----------|------------|------------|---------|-------|
| Uninfected   | No drug         |               | 1         | 3388.5   | 1          | 0.0%       | 0.0%    | 0.0%  |
|              |                 |               | 2         | 2816.5   | 0          | 0.0%       |         |       |
| USA-WA1/2020 | No drug         |               | 1         | 2901.75  | 790.5      | 27.2%      | 29.0%   | 2.5%  |
|              |                 |               | 2         | 2216     | 683        | 30.8%      |         |       |
|              | REGN10933       | 0.7 nM        | 1         | 3482     | 0          | 0.0%       | 0.0%    | 0.0%  |
|              |                 |               | 2         | 3583     | 2          | 0.1%       |         |       |
|              |                 | 0.07 nM       | 1         | 3596     | 557        | 15.5%      | 15.6%   | 0.1%  |
|              |                 |               | 2         | 3414     | 536        | 15.7%      |         |       |
|              |                 | 0.007 nM      | 1         | 3192     | 959        | 30.0%      | 24.4%   | 7.9%  |
|              |                 |               | 2         | 3560     | 671        | 18.8%      |         |       |
|              | 0.0007 nM       | 1             | 3462      | 775      | 22.4%      | 24.1%      | 2.4%    |       |
|              |                 | 2             | 3675      | 946      | 25.7%      |            |         |       |
|              | Hopeaphenol     | 50 $\mu$ M    | 1         | 2023     | 113        | 5.6%       | 3.6%    | 2.8%  |
|              |                 |               | 2         | 1948     | 33         | 1.7%       |         |       |
|              |                 | 30 $\mu$ M    | 1         | 2487     | 190        | 7.6%       | 11.5%   | 5.4%  |
|              |                 |               | 2         | 2585     | 396        | 15.3%      |         |       |
|              |                 | 10 $\mu$ M    | 1         | 2156     | 367        | 17.0%      | 18.7%   | 2.4%  |
|              |                 |               | 2         | 2160     | 441        | 20.4%      |         |       |
|              |                 | 3 $\mu$ M     | 1         | 1765     | 471        | 26.7%      | 23.0%   | 5.2%  |
|              |                 |               | 2         | 2258     | 438        | 19.4%      |         |       |
|              |                 | 1 $\mu$ M     | 1         | 2065     | 602        | 29.2%      | 29.2%   | 0.0%  |
|              |                 |               | 2         | 1619     | 472        | 29.2%      |         |       |
|              | Vatalbinoside A | 50 $\mu$ M    | 1         | 2257     | 197        | 8.7%       | 11.2%   | 3.5%  |
|              |                 |               | 2         | 1900     | 260        | 13.7%      |         |       |
|              |                 | 30 $\mu$ M    | 1         | 2626     | 277        | 10.5%      | 9.9%    | 0.9%  |
|              |                 |               | 2         | 2529     | 236        | 9.3%       |         |       |
|              |                 | 10 $\mu$ M    | 1         | 2765     | 567        | 20.5%      | 16.7%   | 5.3%  |
|              |                 |               | 2         | 2208     | 286        | 13.0%      |         |       |
|              |                 | 3 $\mu$ M     | 1         | 3057     | 564        | 18.4%      | 17.8%   | 1.0%  |
|              |                 |               | 2         | 2564     | 438        | 17.1%      |         |       |
|              |                 | 1 $\mu$ M     | 1         | 3381     | 710        | 21.0%      | 17.1%   | 5.5%  |
|              |                 |               | 2         | 2174     | 288        | 13.2%      |         |       |
|              | Vaticanol B     | 50 $\mu$ M    | 1         | 2261     | 386        | 17.1%      | 16.9%   | 0.3%  |
|              |                 |               | 2         | 2259     | 376        | 16.6%      |         |       |
|              |                 | 30 $\mu$ M    | 1         | 2203     | 537        | 24.4%      | 26.8%   | 3.5%  |
|              |                 |               | 2         | 1719     | 504        | 29.3%      |         |       |
|              |                 | 10 $\mu$ M    | 1         | 1774     | 3130       | 38.6%      | 30.0%   | 12.2% |
|              |                 |               | 2         | 685      | 670        | 21.4%      |         |       |
|              | Remdesivir      | 10 $\mu$ M    | 1         | 2431     | 0          | 0.0%       | 0.0%    | 0.0%  |
|              |                 |               | 2         | 2517     | 0          | 0.0%       |         |       |
|              |                 | 3 $\mu$ M     | 1         | 2799     | 155        | 5.5%       | 8.5%    | 4.2%  |
|              |                 |               | 2         | 2216     | 254        | 11.5%      |         |       |
|              |                 | 1 $\mu$ M     | 1         | 3186     | 356        | 11.2%      | 13.5%   | 3.3%  |
|              |                 |               | 2         | 3333     | 529        | 15.9%      |         |       |
| 0.3 $\mu$ M  |                 | 1             | 3114      | 537      | 17.2%      | 21.0%      | 5.3%    |       |
|              |                 | 2             | 2959      | 732      | 24.7%      |            |         |       |

14

15

| Virus   | Agent       | Concentration | Replicate | N Nuclei | N infected | % infected | Average | SD   |
|---------|-------------|---------------|-----------|----------|------------|------------|---------|------|
| B.1.1.7 | No drug     |               | 1         | 3042.75  | 414.5      | 13.6%      | 12.8%   | 1.1% |
|         |             |               | 2         | 3216.75  | 387        | 12.0%      |         |      |
|         | REGN10933   | 0.7 nM        | 1         | 4060     | 0          | 0.0%       | 0.0%    | 0.0% |
|         |             |               | 2         | 4394     | 2          | 0.0%       |         |      |
|         |             | 0.07 nM       | 1         | 3760     | 3          | 0.1%       | 0.1%    | 0.0% |
|         |             |               | 2         | 4264     | 2          | 0.0%       |         |      |
|         |             | 0.007 nM      | 1         | 3674     | 327        | 8.9%       | 10.0%   | 1.5% |
|         |             |               | 2         | 4157     | 458        | 11.0%      |         |      |
|         | 0.0007 nM   | 1             | 3638      | 343      | 9.4%       | 13.1%      | 5.2%    |      |
|         |             | 2             | 2422      | 407      | 16.8%      |            |         |      |
|         | Hopeaphenol | 50 µM         | 1         | 3555     | 0          | 0.0%       | 0.0%    | 0.0% |
|         |             |               | 2         | 3901     | 1          | 0.0%       |         |      |
|         |             | 20 µM         | 1         | 3385     | 238        | 7.0%       | 6.7%    | 0.5% |
|         |             |               | 2         | 4004     | 255        | 6.4%       |         |      |
|         |             | 10 µM         | 1         | 3340     | 372        | 11.1%      | 10.4%   | 1.1% |
|         |             |               | 2         | 3825     | 367        | 9.6%       |         |      |
| 3 µM    |             | 1             | 3425      | 349      | 10.2%      | 12.1%      | 2.7%    |      |
|         |             | 2             | 3735      | 521      | 13.9%      |            |         |      |
| B.1.351 | No drug     |               | 1         | 3215.5   | 566.5      | 17.6%      | 18.1%   | 0.7% |
|         |             |               | 2         | 3229.75  | 603.25     | 18.7%      |         |      |
|         | REGN10933   | 7 nM          | 1         | 3889     | 16         | 0.4%       | 0.3%    | 0.2% |
|         |             |               | 2         | 4447     | 6          | 0.1%       |         |      |
|         |             | 0.7 nM        | 1         | 3443     | 497        | 14.4%      | 16.6%   | 3.0% |
|         |             |               | 2         | 3712     | 693        | 18.7%      |         |      |
|         |             | 0.07 nM       | 1         | 3599     | 470        | 13.1%      | 14.5%   | 2.1% |
|         |             |               | 2         | 3509     | 560        | 16.0%      |         |      |
|         |             | 0.007 nM      | 1         | 3679     | 588        | 16.0%      | 15.0%   | 1.4% |
|         |             |               | 2         | 2991     | 417        | 13.9%      |         |      |
|         |             | 0.0007 nM     | 1         | 3126     | 454        | 14.5%      | 17.5%   | 4.2% |
|         |             |               | 2         | 2338     | 480        | 20.5%      |         |      |
|         | Hopeaphenol | 50 µM         | 1         | 3007     | 4          | 0.1%       | 0.1%    | 0.1% |
|         |             |               | 2         | 3263     | 2          | 0.1%       |         |      |
|         |             | 20 µM         | 1         | 3074     | 309        | 10.1%      | 9.9%    | 0.2% |
|         |             |               | 2         | 3216     | 314        | 9.8%       |         |      |
|         |             | 10 µM         | 1         | 3395     | 348        | 10.3%      | 11.6%   | 1.9% |
|         |             |               | 2         | 3388     | 437        | 12.9%      |         |      |
| 3 µM    |             | 1             | 3347      | 634      | 18.9%      | 20.6%      | 2.4%    |      |
|         |             | 2             | 3777      | 843      | 22.3%      |            |         |      |

16

17

18
